# Supplementary material for: Lone-pair-induced formation of intrinsic one-dimensional SbSX (X = Cl, Br, I) helix chain materials
Source: Royal Society of Chemistry journal article supplement (doi:10.1039/d3cp00061c), 2023-01-01
Supplement: d3cp00061c1.pdf [file d3cp00061c1.pdf]

**Lone-pair-induced formation of intrinsic one-dimensional SbSX (X = Cl, Br, I)  
helix chain materials**

*Supporting Information*

Ziye Zhu,<sup>1,2</sup> Shu Zhao,<sup>1,2</sup> Xiaoping Yao,<sup>1,2</sup> and Cong Hu<sup>1,\*</sup>

<sup>1</sup>*School of Engineering, Westlake University, Hangzhou 310030, China*

<sup>2</sup>*School of Materials Science and Engineering,  
Zhejiang University, Hangzhou 310027, China*

---

\* hucong@westlake.edu.cn

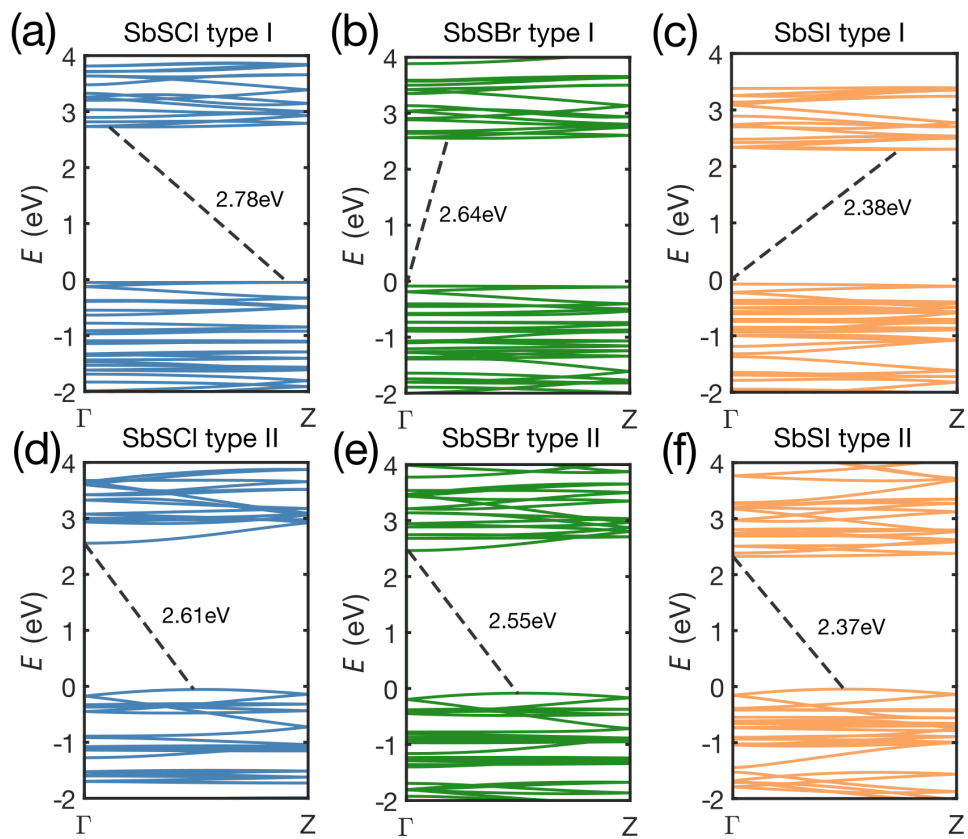

Figure S1. Electronic band structure of 1D SbSX ( $X = \text{Cl}, \text{Br}, \text{I}$ ) helix-chains calculated with PBE functional.

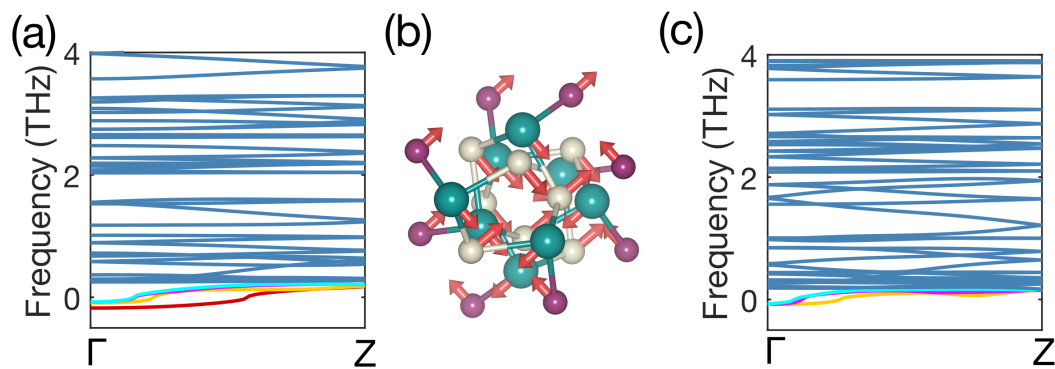

Figure S2. (a) Phonon spectra of SbSCl helix chain type I phase. (b) Atomic displacement patterns corresponding to the torsional mode (the red line in (a)). (c) Phonon spectra of SbSCl helix chain type II phase. The three non-red colorful lines indicate the three acoustic modes, and the red-line optical mode indicates the torsional mode.

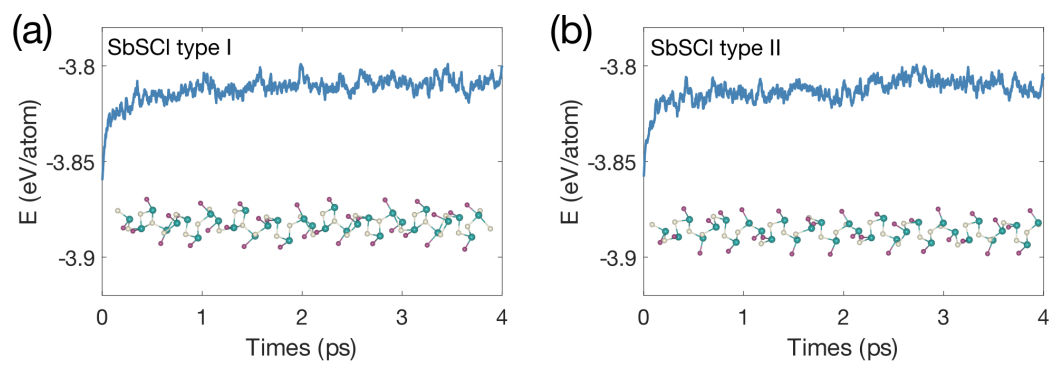

Figure S3. The evolution of energy of 1D SbSCl helix-chain type I phase (a) and type II phase (b) simulated with ab initio molecular dynamics at 300 K. The inset illustrates the final structures at 4 ps.

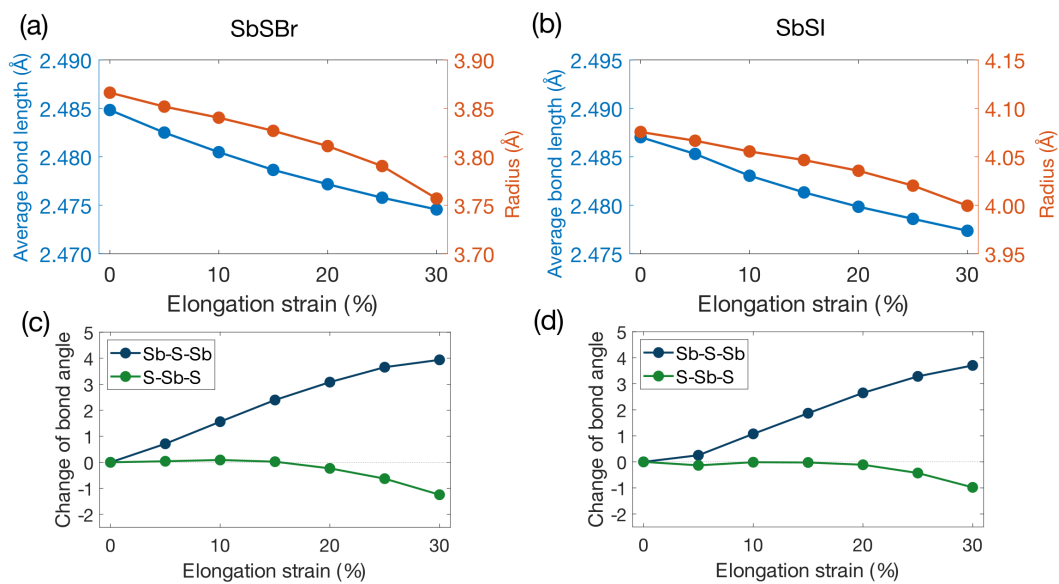

Figure S4. (a)(b) The average bond length and radius of 1D SbSBr and SbSI helix-chain type II phase as the function of elongation strains. (c)(d) Variation of average change of bond angle of Sb-S-Sb and S-Sb-S in 1D SbSBr and SbSI helix-chain type II phase under different elongation strains, compared to the equilibrium state.
